# Supplementary material for: Field supported slow magnetic relaxation in a quasi-one-dimensional copper(ii) complex with a pentaheterocyclic triphenodioxazine
Source: Royal Society of Chemistry journal article supplement (doi:10.1039/d1nj03217h), 2021-01-01
Supplement: d1nj03217h1.pdf [file d1nj03217h1.pdf]

## Supporting Information

### Field supported slow magnetic relaxation in quasi-one-dimensional copper(II) complex with a pentaheterocyclic triphenodioxazine

D.V. Korchagin,<sup>\*a</sup> E.P. Ivakhnenko,<sup>b</sup> O.P. Demidov,<sup>c</sup> A.V. Akimov,<sup>a</sup> R.B. Morgunov,<sup>a</sup> A.G. Starikov,<sup>b</sup> A.V. Palii,<sup>a</sup> V.I. Minkin,<sup>b</sup> and S.M. Aldoshin<sup>a</sup>

<sup>a</sup> *Institute of Problems of Chemical Physics, Russian Academy of Sciences, 1 Acad. Semenov Av., 142432 Chernogolovka, Russia; korden@icp.ac.ru*

<sup>b</sup> *Institute of Physical and Organic Chemistry, Southern Federal University. 194/2 Stachki St. 344090 Rostov on Don. Russia*

<sup>c</sup> *North Caucasus Federal University. 1 Pushkin st., Stavropol, Russian Federation, 355017*

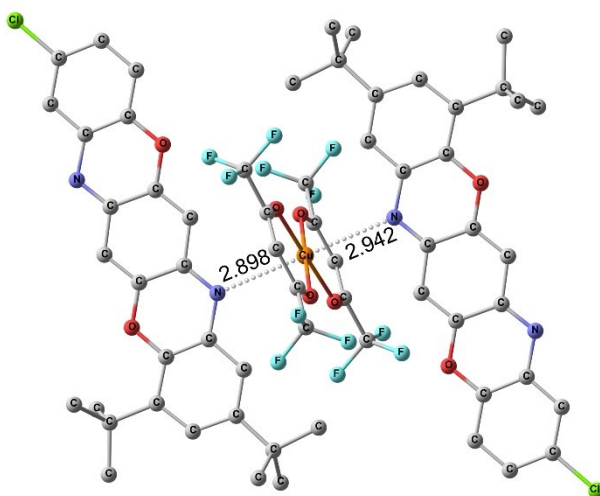

**Fig. S1.** Geometry characteristics of monomeric fragment of coordination polymer **I** calculated by the DFT (B3LYP/6-311++G(g,p)) method. Bond lengths are given in Å, hydrogen atoms are omitted for clarity.

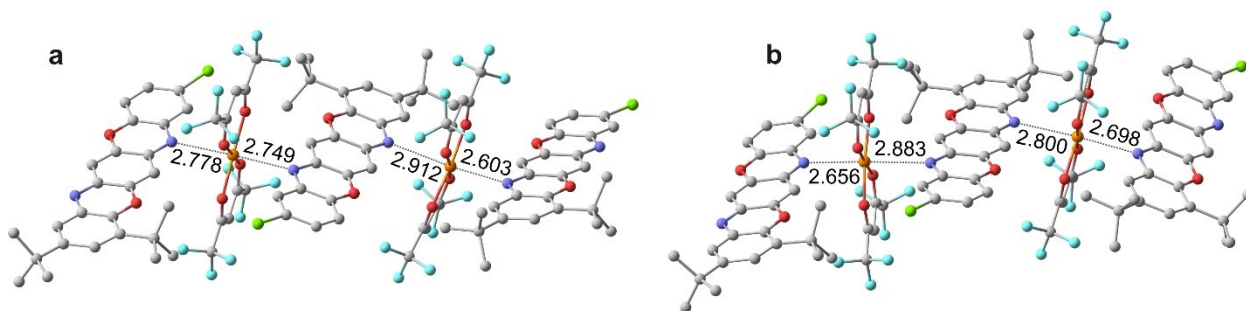

**Fig. S2.** Optimized geometries of dimer fragments of **I** calculated at B3LYP/Def2-SVP level. Bond lengths are given in Å, hydrogen atoms are omitted for clarity.

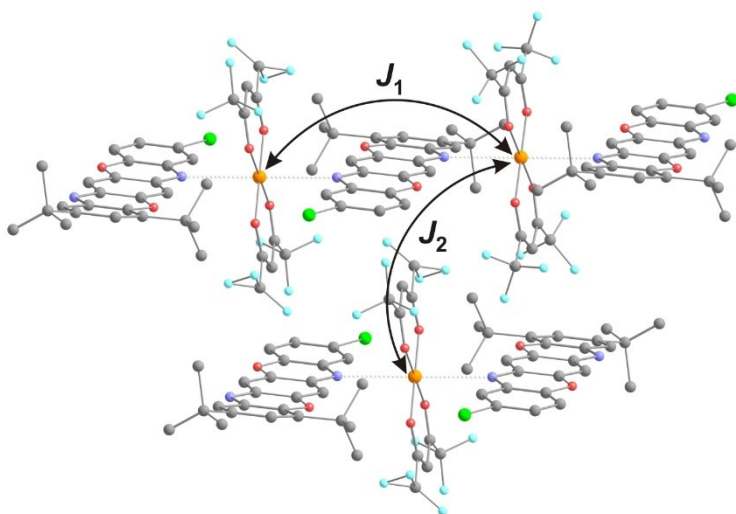

**Fig. S3.** Possible Cu-Cu exchange coupling channels in **I**.

**Table S1.** The exchange spin coupling parameters ( $J$ ,  $\text{cm}^{-1}$ ) calculated by the DFT method.

| Approximation   | $*J_1$ | $J_2$ | $J_3$ |
|-----------------|--------|-------|-------|
| B3LYP/def2-SVP  | 0.42   | 0.21  | 0.42  |
| B3LYP/def2-TZVP | -0.01  | -0.01 | -0.01 |
| TPSSh/def2-TZVP | 0.18   | 0.09  | 0.18  |

\*Formulas for the calculation  $J_1$ - $J_3$ .

$$J_1 = -(E_{\text{HS}} - E_{\text{BS}}) / S_{\text{max}}^2, [1].$$

$$J_2 = -(E_{\text{HS}} - E_{\text{BS}}) / (S_{\text{max}} * (S_{\text{max}} + 1)), [2].$$

$$J_3 = -(E_{\text{HS}} - E_{\text{BS}}) / (\langle S^2 \rangle_{\text{HS}} - \langle S^2 \rangle_{\text{BS}}), [3].$$

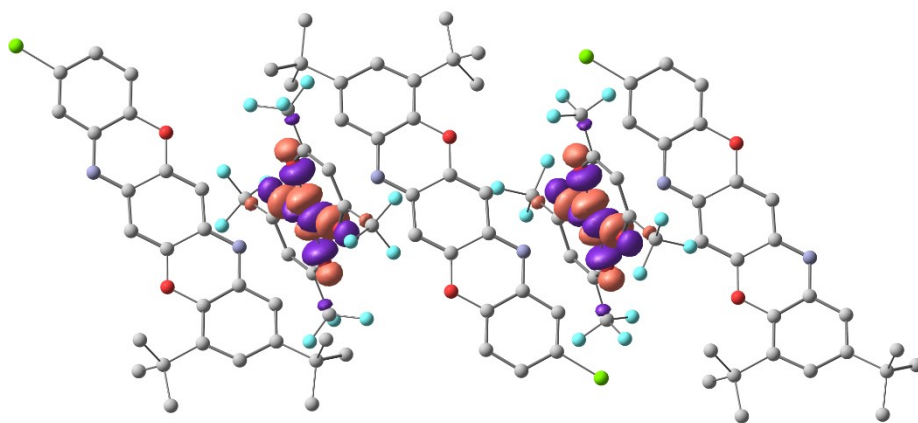

**Fig. S4.** Single-occupied natural (magnetic) orbital in dimer fragment of **I**.

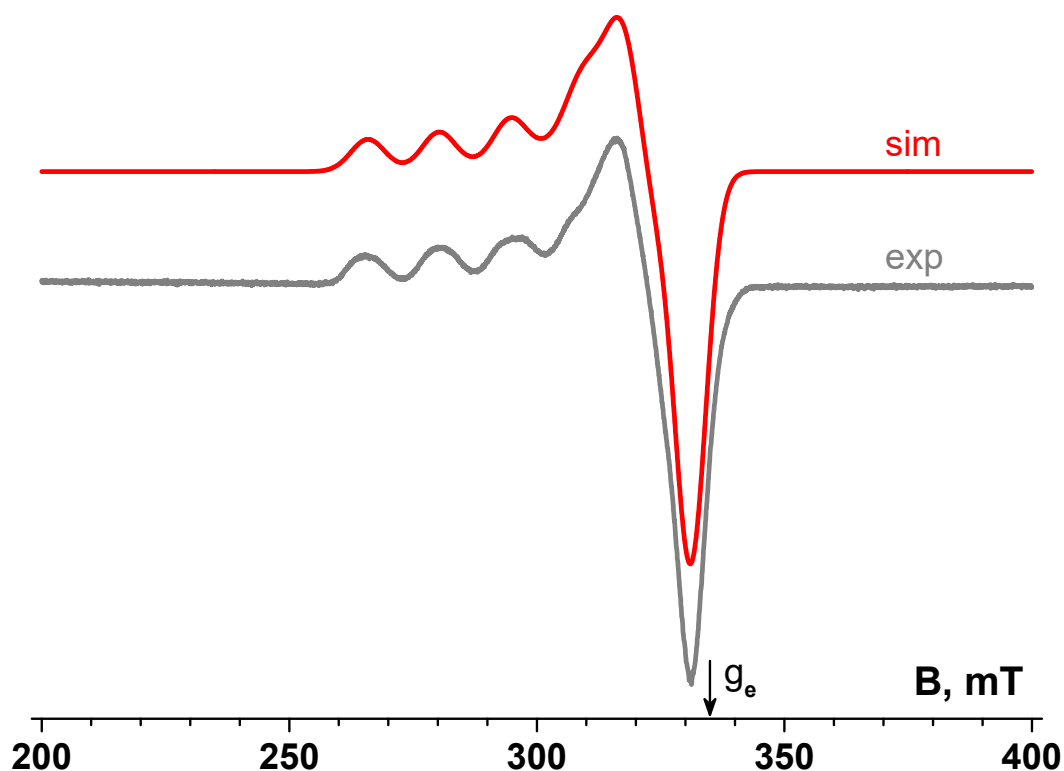

**Fig. S5.** Solid state EPR spectra for **I** (gray line) collected at 7 K and simulated EPR spectra for  $S=1/2$ ,  $g_{\perp} = 2.0639$ ,  $g_{\parallel} = 2.3332$ ,  $A(^{65}\text{Cu}) = [84.5; 84.5; 459]$  MHz (red line), linewidth 6.6 G. Microwave frequency 9.385423 GHz

**Table S2.** The DFT calculated principle values of g-tensor for monomeric fragment of **I**.

| Level of theory            | g-Tensor |       |       |
|----------------------------|----------|-------|-------|
|                            | x        | y     | z     |
| B3LYP def2-SVP             | 2.055    | 2.057 | 2.179 |
| B3LYP def2-TZVP            | 2.057    | 2.058 | 2.190 |
| TPSSH def2-SVP/QZVPP*      | 2.046    | 2.047 | 2.149 |
| TPSSH def2-TZVP/QZVPP*     | 2.046    | 2.047 | 2.147 |
| ZORA TPSSH def2-SVP/QZVPP* | 2.047    | 2.048 | 2.152 |

|                               |       |       |       |
|-------------------------------|-------|-------|-------|
| ZORA TPSSH def2-TZVP/QZVPP*   | 2.047 | 2.048 | 2.150 |
| ZORA D3 TPSSH def2-SVP/QZVPP* | 2.047 | 2.048 | 2.152 |
| D3 TPSSH def2- TZVP/QZVPP*    | 2.049 | 2.050 | 2.157 |

\* QZVPP basis set was used for copper atom

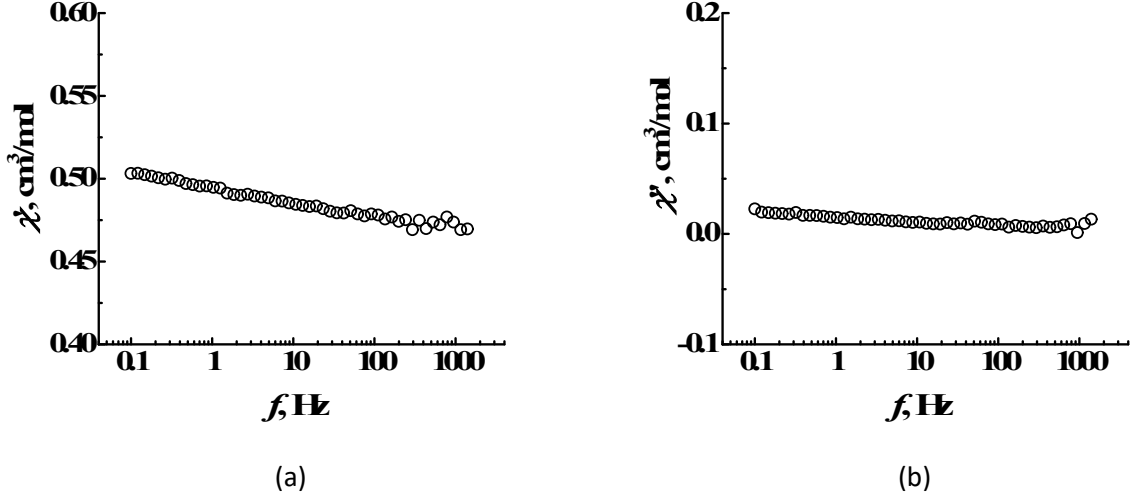

Fig. S6. Frequency dependence of the in-phase  $\chi'$  (a), out-of-phase  $\chi''$  (b) AC susceptibility  $\chi_M$  at temperature  $T = 2\text{K}$  and  $H_{DC} = 0\text{ Oe}$ .

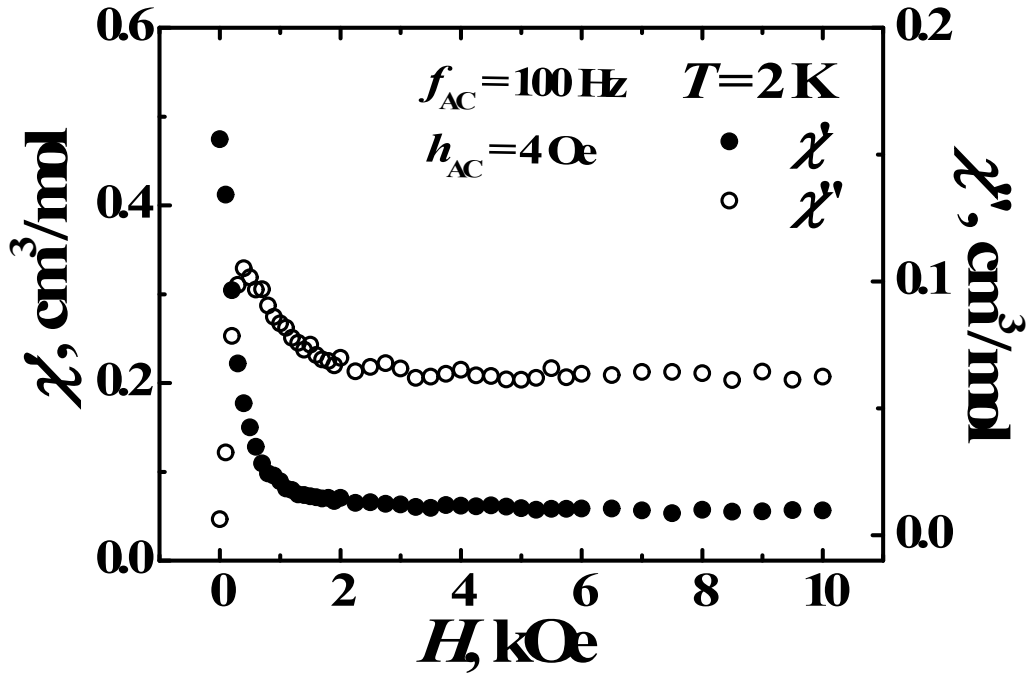

Fig. S7. Field dependence of the in-phase  $\chi'$  and out-of-phase  $\chi''$  AC susceptibility  $\chi_M$  at temperature  $T = 2\text{K}$  and frequency  $f_{AC} = 100\text{ Hz}$ . The maximum on the out-of-phase  $\chi''$  AC susceptibility is at  $H_{DC} \sim 500\text{ Oe}$ .

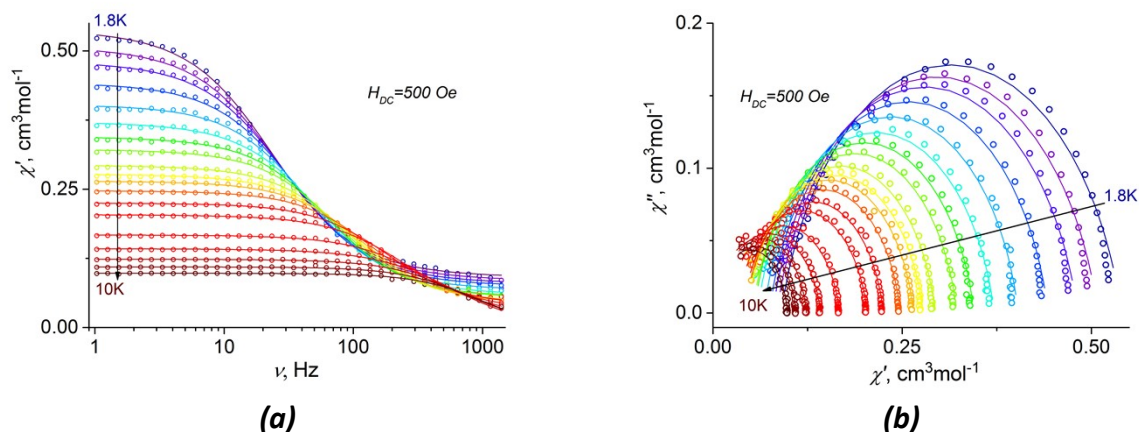

**Fig. S8.** Frequency dependence of the in-phase  $\chi'$  (a) AC susceptibility  $\chi_M$  and Cole-Cole diagrams (b) at different temperatures and  $H_{DC}=500$  Oe for **I** (points – experiment, lines – fit by generalized Debye model).

**Table S3.** Best fit parameters of the one-component Debye model for the Cole-Cole plot of complex **I** at  $H_{DC} = 500$  Oe

| $T, K$ | $\chi_S, \text{cm}^3 \text{mol}^{-1}$ | $\chi_T, \text{cm}^3 \text{mol}^{-1}$ | $\tau, s$ | $\alpha$ | $R_1^a$   |
|--------|---------------------------------------|---------------------------------------|-----------|----------|-----------|
| 1.8    | 0.090                                 | 0.540                                 | 0.679E-02 | 0.171    | 0.32E-02  |
| 1.9    | 0.084                                 | 0.509                                 | 0.604E-02 | 0.167    | 0.30E-02  |
| 2.0    | 0.079                                 | 0.482                                 | 0.537E-02 | 0.161    | 0.31E-02  |
| 2.2    | 0.074                                 | 0.443                                 | 0.451E-02 | 0.148    | 0.19E-02  |
| 2.4    | 0.068                                 | 0.403                                 | 0.366E-02 | 0.136    | 0.20E-02  |
| 2.6    | 0.059                                 | 0.372                                 | 0.299E-02 | 0.144    | 0.15E-02  |
| 2.8    | 0.054                                 | 0.345                                 | 0.253E-02 | 0.134    | 0.15E-02  |
| 3.0    | 0.052                                 | 0.322                                 | 0.217E-02 | 0.128    | 0.93E-03  |
| 3.3    | 0.046                                 | 0.293                                 | 0.173E-02 | 0.125    | 0.12E-02  |
| 3.5    | 0.045                                 | 0.277                                 | 0.153E-02 | 0.125    | 0.10E-02  |
| 3.7    | 0.042                                 | 0.265                                 | 0.133E-02 | 0.121    | 0.61E-03  |
| 4.0    | 0.043                                 | 0.247                                 | 0.113E-02 | 0.115    | 0.45E-03  |
| 4.5    | 0.039                                 | 0.225                                 | 0.867E-03 | 0.121    | 0.54E-03  |
| 5.0    | 0.031                                 | 0.204                                 | 0.655E-03 | 0.129    | 0.42E-03  |
| 6.0    | 0.020                                 | 0.167                                 | 0.441E-03 | 0.129    | 0.44E-03  |
| 7.0    | 0.005                                 | 0.142                                 | 0.291E-03 | 0.143    | 0.31E-03  |
| 8.0    | 0.001                                 | 0.123                                 | 0.237E-03 | 0.108    | 0.221E-03 |
| 9.0    | 0.004                                 | 0.110                                 | 0.202E-03 | 0.090    | 0.25E-03  |
| 10.0   | 0.000                                 | 0.098                                 | 0.163E-03 | 0.074    | 0.24E-03  |

<sup>a</sup> The mean residual sum of squares,  $R_1 = \frac{1}{n} \sum_{i=1}^n \frac{(Y_{\text{exp}} - Y_{\text{calc}})^2}{Y_{\text{exp}}^2}$

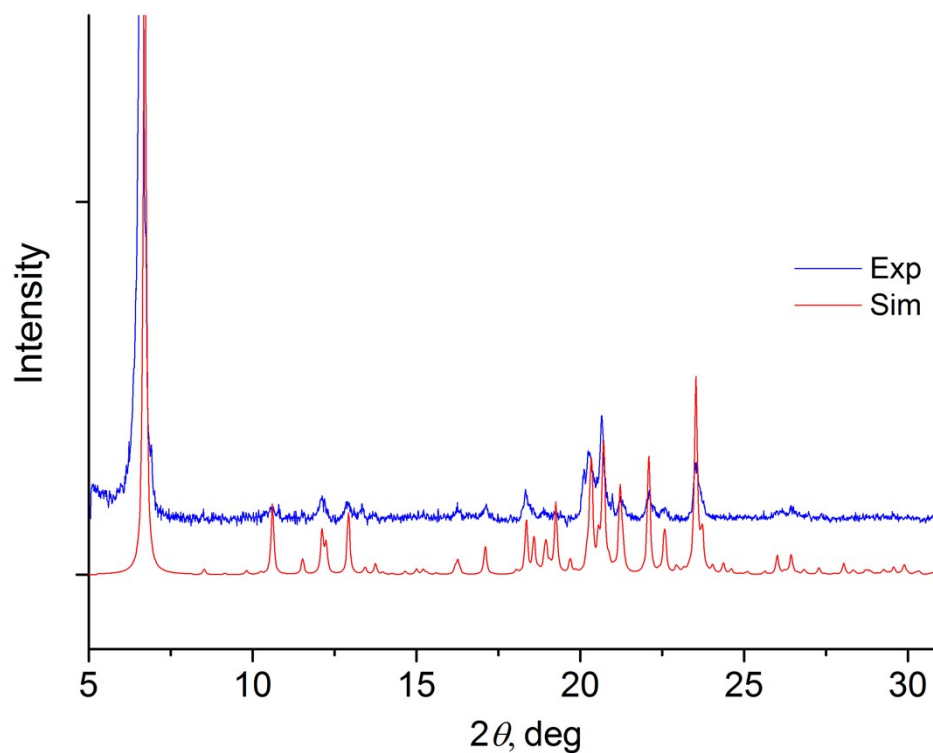

**Fig. S9.** Powder X-ray diffraction pattern of polycrystalline sample of complex I: experimental (blue), and calculated from single crystal data (red).

### References

1. A. P. Ginsberg, *J. Am. Chem. Soc.*, 1980, **102**, 111-117.
2. A. Bencini, D. Gatteschi, *J. Am. Chem. Soc.*, 1980, **108**, 5763-
3. T. Soda, Y. Kitagawa, T. Onishi, Y. Takano, Y. Shigeta, H. Nagao, Y. Yoshioka, and K. Yamaguchi, *Chem. Phys. Lett.* 2000, **319**, 223-230.
